# Supplementary material for: Interplay of ion specificity, pH and buffers: insights from electrophoretic mobility and pH measurements of lysozyme solutions
Source: Royal Society of Chemistry journal article supplement (doi:10.1039/c3ra00063j), 2013-01-01
Supplement: c3ra00063j.pdf [file c3ra00063j.pdf]

## Electronic Supplementary Information

### *Interplay of Ion Specificity, pH and Buffers: Insights from Electrophoretic Mobility and pH Measurements of Lysozyme Solutions*

Francesca Cugia,<sup>‡</sup> Maura Monduzzi,<sup>‡</sup> Barry W. Ninham,<sup>†</sup> and Andrea Salis<sup>‡,\*</sup>

<sup>‡</sup>*Department of Chemical and Geological Sciences, University of Cagliari-CSGI and CNBS, Cittadella Universitaria, S.S. 554 bivio Sestu, 09042- Monserrato (CA), Italy.*

<sup>†</sup>*Research School of Physical Sciences and Engineering, Australian National University, Canberra, 0200 Australia.*

#### Materials and Methods

**Chemicals.** Lysozyme from hen egg white (70,000 units/mg; 62971), sodium chloride ( $\geq 99\%$ ; S3014), sodium thiocyanate ( $\geq 98\%$ ; 251410) and sodium phosphate dibasic ( $\geq 99.5\%$ ; S0876), potassium thiocyanate ( $\geq 99\%$ ; P2713), sodium hydroxide ( $\geq 97\%$ ; 221465) and cacodylic acid ( $\geq 98\%$ ; C0125) were purchased from Sigma-Aldrich. Sodium hydrogen carbonate ( $\geq 99\%$ ; 35061), sodium phosphate monobasic ( $\geq 98\%$ ; 401101) and potassium hydroxide ( $\geq 86\%$ ; 314019) were purchased from J.T. Baker. Sodium nitrate ( $\geq 99\%$ ; 205960010) was purchased from Acros Organics. Potassium nitrate ( $\geq 99.5\%$ ; 203180010), potassium thiocyanate ( $\geq 99\%$ ; 197120010) and Tris (hydroxymethyl)aminomethane ( $\geq 99.8\%$ ; 1610719) were from Biorad. Citric acid ( $\geq 99.5\%$ ; 27490) was from Fluka. Potassium chloride ( $\geq 99\%$ ; 12636) was purchased from Riedel-de Haen.

**Instrumental details.** Electrophoretic mobility ( $\mu_E$ ) measurements of lysozyme-buffer and lysozyme-buffer-salt solutions were carried out through electrophoretic light scattering (laser Doppler velocimetry) technique by means of a Zetasizer nano series (Malvern Instruments).

pH measurements, of the same samples used for the determination of  $\mu_E$ , were performed by using a XS-PC 650 (Eutech instruments) pH-meter. The electrode was calibrated by a 3 point calibration through standard buffers at pH 4; 7; and 9.

**Specific ion effects on  $\mu_E$  and pH.** In order to study the effect of salt addition to the electrophoretic mobility and the pH of lysozyme-buffer solutions the following procedure was carried out. Commercially available Lysozyme powder was used without any additional purification step. Lysozyme solutions (1 mg/mL) in 10 mM buffers - Tris (hydroxymethyl)aminomethane, cacodylate, hydrogen carbonate, phosphate and citrate – were all set to the same pH=7.15 by using a small volume of a concentrated base/acid solution. Then different amounts of sodium salts (NaCl, NaNO<sub>3</sub>, NaSCN) or potassium salts (KCl, KNO<sub>3</sub>, and KSCN) were added to 100 mL of a lysozyme-buffer solution obtaining a salt concentration range: 1 mM - 200 mM. After each salt addition the pH was measured. Then a small volume of the resulting solution was put in a scattering cell for the measurement of electrophoretic mobility. Each value of mobility is the average of at least 6 measurements, obtained by mediating 20 simple readings, for each salt concentration. Standard deviations were calculated and displayed as error bars.
